# Supplementary material for: Identification of key snoRNAs serves as biomarkers for hepatocellular carcinoma by bioinformatics methods
Source: PubMed Central journal article supplement (PMC9524901; doi:10.1097/md.0000000000030813), 2022-09-30

**Supplementary Figure 1. Flowchart of this study.** TCGA, The Cancer Genome Atlas; ICGC, International Cancer Genome Consortium; AUC, Area Under Curve; GSEA, Gene Set Enrichment Analysis; GSVA, Gene Set Variation Analysis; snoRNA, small nucleolar RNA

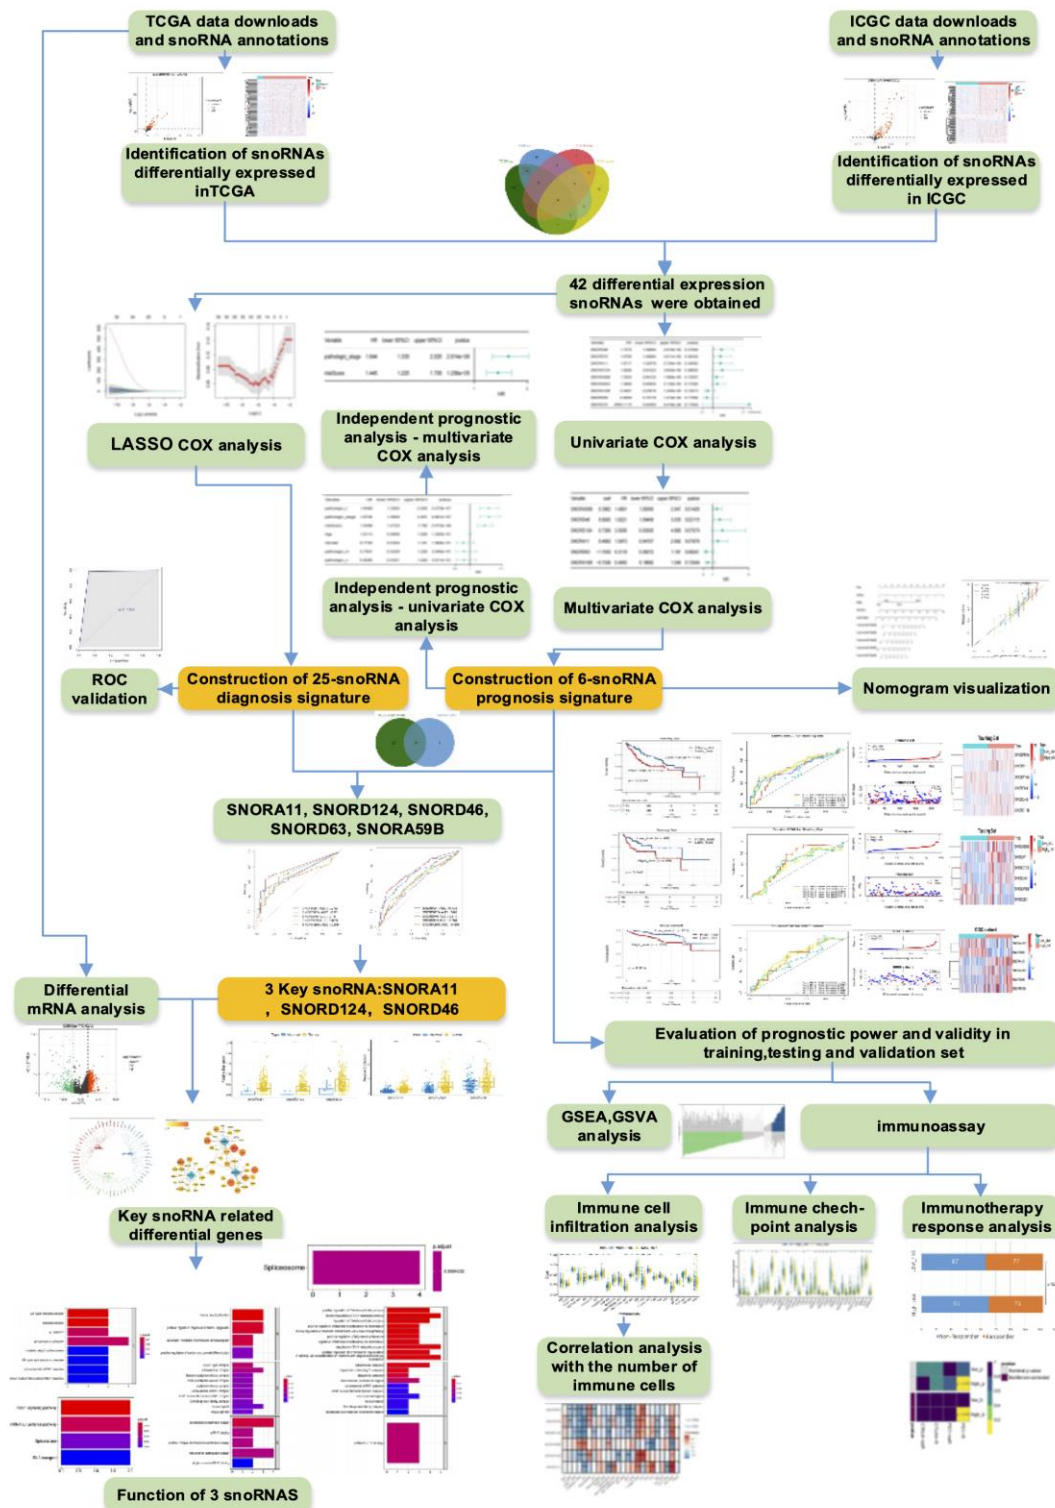

Supplement: medi-101-e30813-s001.pdf [file medi-101-e30813-s001.pdf]
